# Supplementary material
Source: publisher site journal article supplement (https://studysites.uk.sagepub.com/gribben/Appendix/Gribben_Web%20material%20Table%207.1.doc)
Supplement: Supplementary file 1 [file Gribben_Web%20material%20Table%207.1.doc]

Table 7.1 The 10-Step assignment checklist

|  | **Assignment submission date: / /** | **Deadline date** | 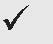 | |
| --- | --- | --- | --- | --- |
| 1 | Set up your assignment folder | / / | |  |
| 2 | Analyse your assignment question | / / | |  |
| 3 | Resource, read, annotate and sort your notes | / / | |  |
| 4 | Critically think – keep and discard | / / | |  |
| 5 | Plan your assignment structure | / / | |  |
| 6 | Write your first draft | / / | |  |
| 7 | Write your second draft – use Turnitin | / / | |  |
| 8 | Do final edit | / / | |  |
| 9 | Do final referencing check | / / | |  |
| 10 | Do final proofread | / / | |  |
|  |  |  | |  |
